# Supplementary material
Source: PubMed Central journal article supplement (PMC9233181)

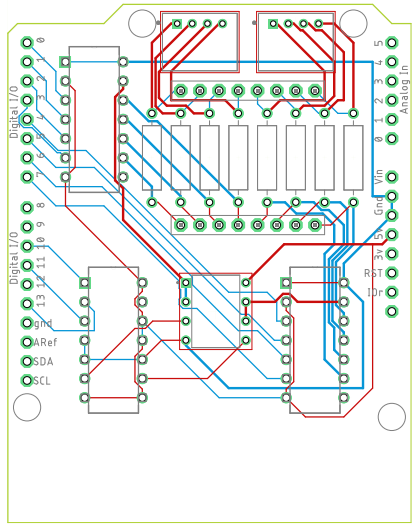

Supplement: NIHMS1811632-supplement-Stimulator_1_0_PCB.pdf [file NIHMS1811632-supplement-Stimulator_1_0_PCB.pdf]

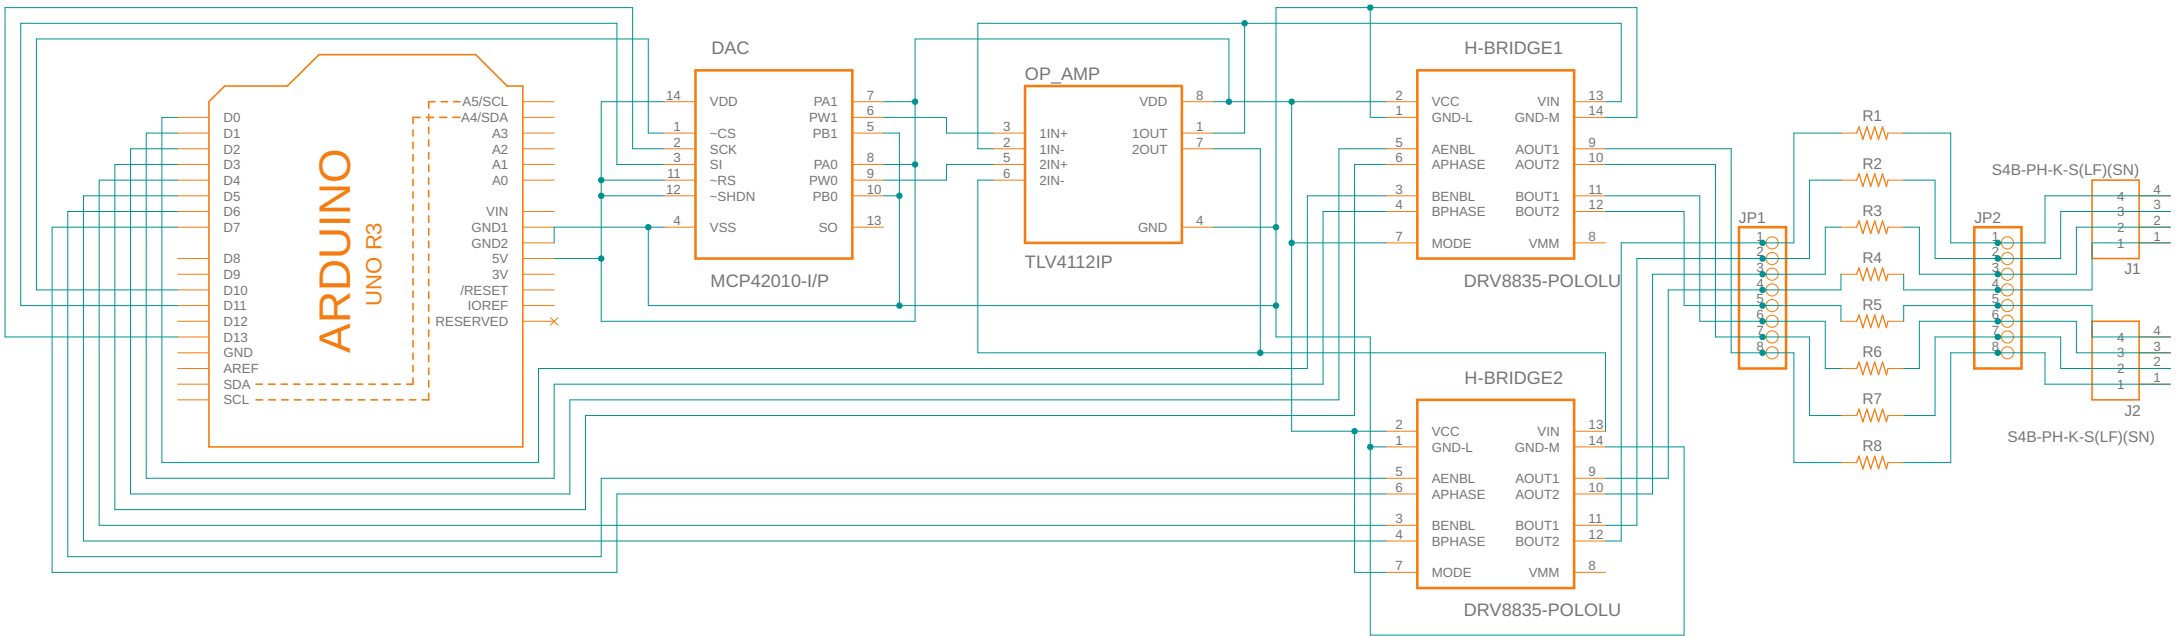

Supplement: NIHMS1811632-supplement-Stimulator_1_0_schematics.pdf [file NIHMS1811632-supplement-Stimulator_1_0_schematics.pdf]
